# Supplementary material for: Rare Plasmid-Mediated AmpC Beta-Lactamase DHA-1 Located on Easy Mobilized IS26-Related Genetic Element Detected in Escherichia coli from Livestock and Food in Germany
Source: MDPI journal article supplement (doi:10.3390/microorganisms12030632), 2024-03-21
Supplement: s1 [file s1]

**Table S1.** SNPs analysis of DHA-1 producing *E. coli* from the food chain in Germany using MINTyper (Malte B Hallgren et al., 2021) with default settings. Unicycler hybrid-assembly of 17-AB00899 was used as reference genome.

| ID<br>SAMPLES | 17-<br>AB00899 | 19-<br>AB00708 | 19-<br>AB01177 | 19-<br>AB01178 | 19-<br>AB01179 | 19-<br>AB01500 | 19-<br>AB02469 | 21-<br>AB01800 |
|---------------|----------------|----------------|----------------|----------------|----------------|----------------|----------------|----------------|
| 17-AB00899    | 0              |                |                |                |                |                |                |                |
| 19-AB00708    | 11036          | 0              |                |                |                |                |                |                |
| 19-AB01177    | 11281          | 1076           | 0              |                |                |                |                |                |
| 19-AB01178    | 21178          | 22975          | 23144          | 0              |                |                |                |                |
| 19-AB01179    | 11567          | 4100           | 4355           | 23007          | 0              |                |                |                |
| 19-AB01500    | 29130          | 31330          | 31398          | 32833          | 31356          | 0              |                |                |
| 19-AB02469    | 34200          | 36512          | 36413          | 37838          | 36573          | 37702          | 0              |                |
| 21-AB01800    | 9294           | 12813          | 12753          | 22936          | 13305          | 31178          | 35994          | 0              |

## References

1. Hallgren, M.B.; Overballe-Petersen, S.; Lund, O.; Hasman, H.; Clausen, P. T. L. C.; MINTyper: an outbreak-detection method for accurate and rapid SNP typing of clonal clusters with noisy long reads, *Biol Methods Prot* Volume 6, Issue 1, **2021**, bpab008, <https://doi.org/10.1093/biometmethods/bpab008>
